# Supplementary material
Source: MDPI journal article supplement (https://www.mdpi.com/2073-4395/13/3/901)
Supplement: s1 [file s1]

|                  |                |                |                |
|------------------|----------------|----------------|----------------|
| <b>III Block</b> | <b>ECO</b>     | <b>NOV</b>     | <b>BS</b>      |
|                  | <b>Mic</b>     | <b>Bio</b>     | <b>Control</b> |
|                  | <b>Bio</b>     | <b>Control</b> | <b>MiBi</b>    |
|                  | <b>Control</b> | <b>MiBi</b>    | <b>Mic</b>     |
|                  | <b>MiBi</b>    | <b>Mic</b>     | <b>Bio</b>     |
| <b>II Block</b>  | <b>NOV</b>     | <b>BS</b>      | <b>ECO</b>     |
|                  | <b>Bio</b>     | <b>Control</b> | <b>MiBi</b>    |
|                  | <b>Mic</b>     | <b>MiBi</b>    | <b>Control</b> |
|                  | <b>MiBi</b>    | <b>Mic</b>     | <b>Bio</b>     |
|                  | <b>Control</b> | <b>Bio</b>     | <b>Mic</b>     |
| <b>I Block</b>   | <b>ECO</b>     | <b>NOV</b>     | <b>BS</b>      |
|                  | <b>MiBi</b>    | <b>Bio</b>     | <b>Mic</b>     |
|                  | <b>Control</b> | <b>Mic</b>     | <b>Bio</b>     |
|                  | <b>Bio</b>     | <b>Control</b> | <b>MiBi</b>    |
|                  | <b>Mic</b>     | <b>MiBi</b>    | <b>Control</b> |

**Figure S1.** Layout of the experimental design.
